# Supplementary material for: Environmental and Genetic Factors Associated with Solanesol Accumulation in Potato Leaves
Source: Front Plant Sci. 2016 Aug 25;7:1263. doi: 10.3389/fpls.2016.01263 (PMC4996988; doi:10.3389/fpls.2016.01263)
Supplement: Supplementary file 2 [file Table2.pdf]

Table S2. Leaf selenesol content ( $\mu\text{g}/\text{mg}$ ) DW in the OSH population.

| id       | name  | 2014 msg r1 | 2014 msg r2 | 2014 msg r3 | 2014 msg r4 | 2014 msg r5 | 2014 msg r6 | 2014 msg r7 | 2015 msg r1 | 2015 msg r2 | 2015 msg r3 | 2015 msg r4 | 2015 msg r5 | 2015 msg r6 | 2015 msg r7 | 2016 msg r1 | 2016 msg r2 | 2016 msg r3 | 2016 msg r4 | 2016 msg r5 | 2016 msg r6 | 2016 msg r7 |
|----------|-------|-------------|-------------|-------------|-------------|-------------|-------------|-------------|-------------|-------------|-------------|-------------|-------------|-------------|-------------|-------------|-------------|-------------|-------------|-------------|-------------|-------------|
| 00000001 | 1     | 1.053       | 1.740       | 0.785       | 1.460       | 2.29        | 1.53        | 2.53        | 2.45        | 0.937       | 0.661       | 0.616       | 0.74        | 5.55        | 4.75        | 5.30        | 5.20        | 5.20        | 5.20        | 5.20        | 5.20        | 5.20        |
| 00000012 | 2     | 0.280       | 0.174       | 0.253       | 0.236       | 2.88        | 1.25        | 1.99        | 2.04        | 0.143       | 0.370       | 0.100       | 0.20        | 2.39        | 2.86        | 2.67        | 2.64        | 2.64        | 2.64        | 2.64        | 2.64        | 2.64        |
| 00000044 | 4     | "           | "           | "           | "           | "           | "           | "           | "           | "           | "           | "           | "           | "           | "           | "           | "           | "           | "           | "           | "           | "           |
| 00000078 | 7     | 1.035       | 0.936       | 0.883       | 1.024       | 2.89        | 2.87        | 4.66        | 5.50        | 1.356       | 1.920       | 2.576       | 1.95        | 6.21        | 9.38        | 7.47        | 7.69        | 7.69        | 7.69        | 7.69        | 7.69        | 7.69        |
| 00000109 | 9     | 0.672       | 0.984       | 0.815       | 0.624       | 2.96        | 2.26        | 2.51        | 2.58        | 0.812       | 0.749       | 0.560       | 0.64        | 3.06        | 2.83        | 2.58        | 2.83        | 2.58        | 2.83        | 2.58        | 2.83        | 2.58        |
| 00000130 | 10    | 0.465       | 0.882       | 0.258       | 0.525       | 2.90        | 3.58        | 2.51        | 3.00        | 0.703       | 0.726       | 0.304       | 0.64        | 3.68        | 3.42        | 4.71        | 3.94        | 3.94        | 3.94        | 3.94        | 3.94        | 3.94        |
| 00000142 | 12    | 0.299       | 0.224       | 0.064       | 0.809       | 1.25        | 1.47        | 1.89        | 1.37        | 0.285       | 0.261       | 0.429       | 0.32        | 1.72        | 2.00        | 1.25        | 1.66        | 1.66        | 1.66        | 1.66        | 1.66        | 1.66        |
| 00000154 | 13    | 0.273       | 0.176       | 0.293       | 0.244       | 2.75        | 2.47        | 1.57        | 1.57        | 0.487       | 0.811       | 0.667       | 0.62        | 2.77        | 2.44        | 2.44        | 2.44        | 2.44        | 2.44        | 2.44        | 2.44        | 2.44        |
| 00000164 | 14    | 0.548       | 0.880       | 0.608       | 0.655       | 2.05        | 2.80        | 2.37        | 2.44        | 1.117       | 1.243       | 0.712       | 1.02        | 6.56        | 4.85        | 5.27        | 5.56        | 5.56        | 5.56        | 5.56        | 5.56        | 5.56        |
| 00000185 | 15    | 0.507       | 0.735       | 0.580       | 0.801       | 1.94        | 1.85        | 1.99        | 1.75        | 1.134       | 0.591       | 0.683       | 1.12        | 5.52        | 4.36        | 5.17        | 5.02        | 5.02        | 5.02        | 5.02        | 5.02        | 5.02        |
| 00000221 | 21    | 0.209       | 0.435       | 0.382       | 0.329       | 0.99        | 1.17        | 1.60        | 1.26        | 0.682       | 0.626       | 0.359       | 0.52        | 2.22        | 2.36        | 2.09        | 2.52        | 2.52        | 2.52        | 2.52        | 2.52        | 2.52        |
| 00000232 | 22    | 0.562       | 0.572       | 0.464       | 0.365       | 0.66        | 0.22        | 0.52        | 0.66        | 0.395       | 0.594       | 1.005       | 1.08        | 4.66        | 3.92        | 3.92        | 3.92        | 3.92        | 3.92        | 3.92        | 3.92        | 3.92        |
| 00000244 | 24    | 0.280       | 0.281       | 0.927       | 0.285       | 2.34        | 1.44        | 1.77        | 1.81        | 0.866       | 1.048       | 0.798       | 0.90        | 1.72        | 1.82        | 1.38        | 1.72        | 1.72        | 1.72        | 1.72        | 1.72        | 1.72        |
| 00000236 | 26    | 0.155       | 0.224       | 0.184       | 0.189       | 0.36        | 1.30        | 2.56        | 1.40        | 0.213       | 0.260       | 0.328       | 0.27        | 1.76        | 1.37        | 1.09        | 1.41        | 1.41        | 1.41        | 1.41        | 1.41        | 1.41        |
| 00000250 | 28    | 0.136       | 0.130       | 0.277       | 0.26        | 0.76        | 0.26        | 0.76        | 0.26        | 0.254       | 0.268       | 0.213       | 0.25        | 1.57        | 1.57        | 1.09        | 1.57        | 1.57        | 1.57        | 1.57        | 1.57        | 1.57        |
| 00000268 | 28    | 0.247       | 0.095       | 0.199       | 0.181       | 1.45        | 1.82        | 1.40        | 2.21        | 0.885       | 0.724       | 0.400       | 0.67        | 0.53        | 0.50        | 1.05        | 0.70        | 0.70        | 0.70        | 0.70        | 0.70        | 0.70        |
| 00000298 | 29    | 0.968       | 2.088       | 2.738       | 1.929       | 5.29        | 5.45        | 4.23        | 4.89        | 0.411       | 0.636       | 0.162       | 0.80        | 0.92        | 1.85        | 0.99        | 1.39        | 1.39        | 1.39        | 1.39        | 1.39        | 1.39        |
| 00000332 | 32    | 2.400       | 0.787       | 2.061       | 1.769       | 2.80        | 2.79        | 3.13        | 2.91        | 0.592       | 0.722       | 0.442       | 0.59        | 2.21        | 2.37        | 1.74        | 2.11        | 2.11        | 2.11        | 2.11        | 2.11        | 2.11        |
| 00000368 | 41    | 0.380       | 0.405       | 0.520       | 0.460       | 1.45        | 1.82        | 1.40        | 2.21        | 0.885       | 0.724       | 0.400       | 0.67        | 0.53        | 0.50        | 1.05        | 0.70        | 0.70        | 0.70        | 0.70        | 0.70        | 0.70        |
| 00000409 | 49    | 0.560       | 0.787       | 0.248       | 0.591       | 1.50        | 4.35        | 4.89        | 4.23        | 0.478       | 0.295       | 0.152       | 0.28        | 1.02        | 1.64        | 1.13        | 1.21        | 1.21        | 1.21        | 1.21        | 1.21        | 1.21        |
| 00000500 | 50    | 0.681       | 0.689       | 0.689       | 0.688       | 1.58        | 1.99        | 1.20        | 2.22        | 0.453       | 0.788       | 0.955       | 0.73        | 0.62        | 0.63        | 0.88        | 0.71        | 0.71        | 0.71        | 0.71        | 0.71        | 0.71        |
| 00000531 | 51    | 0.569       | 0.950       | 0.171       | 0.883       | 4.59        | 3.31        | 4.87        | 4.26        | 0.371       | 0.268       | 0.262       | 0.30        | 1.48        | 4.82        | 4.86        | 4.82        | 4.82        | 4.82        | 4.82        | 4.82        | 4.82        |
| 00000537 | 57    | 0.262       | 0.274       | 0.282       | 0.309       | 0.22        | 0.38        | 1.28        | 1.39        | 0.175       | 0.186       | 0.186       | 0.186       | 0.186       | 0.186       | 0.186       | 0.186       | 0.186       | 0.186       | 0.186       | 0.186       | 0.186       |
| 00000558 | 58    | 0.077       | 0.078       | 0.080       | 0.082       | 2.12        | 2.97        | 2.07        | 2.88        | 0.018       | 0.152       | 0.900       | 0.38        | 2.73        | 3.83        | 3.59        | 3.83        | 3.59        | 3.83        | 3.59        | 3.83        | 3.59        |
| 00000601 | 61    | 0.357       | 0.361       | 0.262       | 0.327       | 2.61        | 3.04        | 2.50        | 2.72        | 0.692       | 0.483       | 0.484       | 0.55        | 1.51        | 1.25        | 1.85        | 1.53        | 1.53        | 1.53        | 1.53        | 1.53        | 1.53        |
| 00000604 | 64    | 0.806       | 0.808       | 0.809       | 0.796       | 2.75        | 1.82        | 4.87        | 3.08        | 0.595       | 0.864       | 1.187       | 0.88        | 1.89        | 1.49        | 1.45        | 1.81        | 1.81        | 1.81        | 1.81        | 1.81        | 1.81        |
| 00000609 | 69    | 0.462       | 0.461       | 0.460       | 0.461       | 1.58        | 1.99        | 1.20        | 2.22        | 0.453       | 0.788       | 0.955       | 0.73        | 0.62        | 0.63        | 0.88        | 0.71        | 0.71        | 0.71        | 0.71        | 0.71        | 0.71        |
| 00000666 | 66    | 1.700       | 1.272       | 1.448       | 1.473       | 1.85        | 1.78        | 2.39        | 2.01        | 1.390       | 1.217       | 0.942       | 1.43        | 2.33        | 2.38        | 3.00        | 2.48        | 2.48        | 2.48        | 2.48        | 2.48        | 2.48        |
| 00000699 | 69    | 0.333       | 0.405       | 0.441       | 0.420       | 2.05        | 1.00        | 1.72        | 1.62        | 0.258       | 0.477       | 0.407       | 0.41        | 2.00        | 1.46        | 1.54        | 1.87        | 1.87        | 1.87        | 1.87        | 1.87        | 1.87        |
| 00000701 | 71    | "           | "           | "           | "           | "           | "           | "           | "           | "           | "           | "           | "           | "           | "           | "           | "           | "           | "           | "           | "           | "           |
| 00000718 | 71    | 1.187       | 0.291       | 0.130       | 0.176       | 1.88        | 0.88        | 1.11        | 1.28        | 0.252       | 0.271       | 0.748       | 0.42        | 1.17        | 1.06        | 0.88        | 1.03        | 1.03        | 1.03        | 1.03        | 1.03        | 1.03        |
| 00000778 | 78    | 0.389       | 0.702       | 0.111       | 0.401       | 1.64        | 3.39        | 2.47        | 2.50        | 0.507       | 0.502       | 0.190       | 0.40        | 2.55        | 3.31        | 2.79        | 2.88        | 2.88        | 2.88        | 2.88        | 2.88        | 2.88        |
| 00000779 | 79    | 0.502       | 0.339       | 0.434       | 0.425       | 3.48        | 3.42        | 3.38        | 2.76        | 0.562       | 0.553       | 0.631       | 0.59        | 0.77        | 0.75        | 0.70        | 0.77        | 0.77        | 0.77        | 0.77        | 0.77        | 0.77        |
| 00000800 | 80    | 0.112       | 0.182       | 0.184       | 0.182       | 1.45        | 1.82        | 1.40        | 2.21        | 0.885       | 0.724       | 0.400       | 0.67        | 0.53        | 0.50        | 1.05        | 0.70        | 0.70        | 0.70        | 0.70        | 0.70        | 0.70        |
| 00000801 | 81    | 0.227       | 0.289       | 0.289       | 0.282       | 2.45        | 2.55        | 2.09        | 2.35        | 0.323       | 0.780       | 0.528       | 0.54        | 0.85        | 1.28        | 1.62        | 1.25        | 1.62        | 1.25        | 1.62        | 1.25        | 1.62        |
| 00000803 | 83    | 0.243       | 0.668       | 0.105       | 0.425       | 1.08        | 2.99        | 4.49        | 1.85        | 0.130       | 0.316       | 0.357       | 0.27        | 0.60        | 1.28        | 0.97        | 0.95        | 0.95        | 0.95        | 0.95        | 0.95        | 0.95        |
| 00000806 | 86    | 0.147       | 0.221       | 0.213       | 0.194       | 1.34        | 1.81        | 1.64        | 1.61        | 0.273       | 0.237       | 0.233       | 0.25        | 0.56        | 0.58        | 0.43        | 0.53        | 0.53        | 0.53        | 0.53        | 0.53        | 0.53        |
| 00000807 | 87    | 0.892       | 0.894       | 0.892       | 0.893       | 2.74        | 0.714       | 1.25        | 1.25        | 0.174       | 0.174       | 0.174       | 0.174       | 0.174       | 0.174       | 0.174       | 0.174       | 0.174       | 0.174       | 0.174       | 0.174       | 0.174       |
| 00000808 | 88    | 0.357       | 0.450       | 0.436       | 0.434       | 2.32        | 2.28        | 1.55        | 3.22        | 0.891       | 1.025       | 0.551       | 0.76        | 2.61        | 3.43        | 3.93        | 3.33        | 3.33        | 3.33        | 3.33        | 3.33        | 3.33        |
| 00000890 | 89    | 0.516       | 1.445       | 0.872       | 0.944       | 2.44        | 2.37        | 2.57        | 2.39        | 0.449       | 1.180       | 0.114       | 0.58        | 0.84        | 1.15        | 0.99        | 0.99        | 0.99        | 0.99        | 0.99        | 0.99        | 0.99        |
| 00000900 | 90    | 0.678       | 1.548       | 1.055       | 1.097       | 0.94        | 2.33        | 1.48        | 2.18        | 0.889       | 0.539       | 0.763       | 1.03        | 2.40        | 1.93        | 1.61        | 1.86        | 1.86        | 1.86        | 1.86        | 1.86        | 1.86        |
| 00000901 | 91    | 0.163       | 0.163       | 0.163       | 0.163       | 1.78        | 0.44        | 0.612       | 0.44        | 0.048       | 0.612       | 0.44        | 0.048       | 0.612       | 0.44        | 0.048       | 0.612       | 0.44        | 0.048       | 0.612       | 0.44        | 0.048       |
| 00000977 | 97    | 1.082       | 0.660       | 0.275       | 0.666       | 2.34        | 4.53        | 3.03        | 3.24        | 0.589       | 0.679       | 1.016       | 0.76        | 1.74        | 1.78        | 1.39        | 1.57        | 1.57        | 1.57        | 1.57        | 1.57        | 1.57        |
| 00000999 | 99    | 0.506       | 0.220       | 0.217       | 0.266       | 1.66        | 2.75        | 3.05        | 1.86        | 0.964       | 0.253       | 0.138       | 0.45        | 0.58        | 1.12        | 1.08        | 1.08        | 1.08        | 1.08        | 1.08        | 1.08        | 1.08        |
| 00001000 | 100   | 0.893       | 0.968       | 0.893       | 0.896       | 1.68        | 1.68        | 1.68        | 1.68        | 0.998       | 1.050       | 0.986       | 0.986       | 1.13        | 1.25        | 1.83        | 1.41        | 1.41        | 1.41        | 1.41        | 1.41        | 1.41        |
| 00001007 | 107   | 0.313       | 0.241       | 0.241       | 0.241       | 1.53        | 1.53        | 1.53        | 1.53        | 0.208       | 0.208       | 0.208       | 0.208       | 0.208       | 0.208       | 0.208       | 0.208       | 0.208       | 0.208       | 0.208       | 0.208       | 0.208       |
| 00001008 | 108   | 0.143       | 0.151       | 0.465       | 0.253       | 1.87        | 1.81        | 1.86        | 1.88        | 0.266       | 0.998       | 0.266       | 0.52        | 3.87        | 3.35        | 5.37        | 4.23        | 4.23        | 4.23        | 4.23        | 4.23        | 4.23        |
| 00001110 | 110   | 0.256       | 0.262       | 0.260       | 0.253       | 1.99        | 2.55        | 4.40        | 2.71        | 0.481       | 0.699       | 0.629       | 0.59        | 0.95        | 0.71        | 0.68        | 0.77        | 0.77        | 0.77        | 0.77        | 0.77        | 0.77        |
| 00001111 | 111   | 0.401       | 0.298       | 0.298       | 0.298       | 1.88        | 0.87        | 1.88        | 1.88        | 0.215       | 0.832       | 1.183       | 0.74        | 0.02        | 4.80        | 4.82        | 4.84        | 4.84        | 4.84        | 4.84        | 4.84        | 4.84        |
| 00001113 | 113   | 0.251       | 0.366       | 0.237       | 0.278       | 2.99        | 1.67        | 2.75        | 1.80        | 0.487       | 0.415       | 0.400       | 0.45        | 3.63        | 3.37        | 4.15        | 3.72        | 3.72        | 3.72        | 3.72        | 3.72        | 3.72        |
| 00001116 | 116   | 0.229       | 0.261       | 0.320       | 0.267       | 1.73        | 1.12        | 1.66        | 1.50        | 0.487       | 0.415       | 0.400       | 0.45        | 3.63        | 3.37        | 4.15        | 3.72        | 3.72        | 3.72        | 3.72        | 3.72        | 3.72        |
| 00001211 | 121   | 0.019       | 0.099       | 0.034       | 0.147       | 4.35        | 8.51        | 2.51        | 8.26        | 0.199       | 0.719       | 0.452       | 0.46        | 8.33        | 5.56        | 2.49        | 3.86        | 3.86        | 3.86        | 3.86        | 3.86        | 3.86        |
| 00001212 | 122   | "           | "           | "           | "           | "           | "           | "           | "           | "           | "           | "           | "           | "           | "           | "           | "           | "           | "           | "           | "           | "           |
| 00001213 | 123   | 0.251       | 0.367       | 0.333       | 0.314       | 2.09        | 2.02        | 3.11        | 2.990       | 0.383       | 0.651       | 1.086       | 0.71        | 2.82        | 2.79        | 2.49        | 2.70        | 2.70        | 2.70        | 2.70        | 2.70        | 2.70        |
| 00001216 | 126   | 0.182       | 0.252       | 0.528       | 0.321       | 3.07        | 2.57        | 3.35        | 1.00        | 1.460       | 2.073       | 1.676       | 1.74        | 2.10        | 2.58        | 1.58        | 2.09        | 2.09        | 2.09        | 2.09        | 2.09        | 2.09        |
| 00001217 | 127   | 0.521       | 0.151       | 0.088       | 0.293       | 2.08        | 1.27        | 1.84        | 1.71        | 0.408       | 0.572       | 0.835       | 0.60        | 3.29        | 2.64        | 3.17        | 2.80        | 2.80        | 2.80        | 2.80        | 2.80        | 2.80        |
| 00001218 | 128</ |             |             |             |             |             |             |             |             |             |             |             |             |             |             |             |             |             |             |             |             |             |
