# Supplementary material for: Environmental and Genetic Factors Associated with Solanesol Accumulation in Potato Leaves
Source: PubMed Central journal article supplement (PMC4996988; doi:10.3389/fpls.2016.01263), 2016-08-25
Supplement: Table1.pdf [file Table1.pdf]

**Table S1.** Primer sequences used for cloning MEP pathway genes.

| Gene   | Transcript ID        |         | Primer sequences (5' to 3')                    |
|--------|----------------------|---------|------------------------------------------------|
| DXS1   | PGSC0003DMT400058821 | Forward | GCGCCGTCTCGCTCGAATGGCTTTGTGTGCTTATGCA          |
|        |                      | Reverse | GCGCCGTCTCGCTCGAAGCTTATGTCATGACCTCTAGAGC       |
| DXS2   | PGSC0003DMT400041591 | Forward | GCGCCGTCTCGCTCGAATGGCAGTTTCTTCAGGTCC           |
|        |                      | Reverse | GCGCCGTCTCGCTCGAAGCTATAGCATTTTGGAGATTGATTTA    |
| DXR    | PGSC0003DMT400062965 | Forward | GCGCCGTCTCGCTCGAATGGCCCTCAATTTGCTTTCT          |
|        |                      | Reverse | GCGCCGTCTCGCTCGAAGCTCATAACGAGAGCTGGACTCA       |
| CMS    | PGSC0003DMT400046906 | Forward | GCGCCGTCTCGCTCGAATGTCTACTCTTCAATTGGGTATC       |
|        |                      | Reverse | GCGCCGTCTCGCTCGAAGCCTAAGATTCTTCAATGTTCAATATTC  |
| CMK    | PGSC0003DMT400058461 | Forward | GCGCCGTCTCGCTCGAATGGCTTCTCTGTAATATTCTTTGT      |
|        |                      | Reverse | GCGCCGTCTCGCTCGAAGCTCAATTTACAGGCTCTTCTGAG      |
| HDR    | PGSC0003DMT400064783 | Forward | GCGCCGTCTCGCTCGAATGGCTATTCTCTCCAATTC           |
|        |                      | Reverse | GCGCCGTCTCGCTCGAAGCTTAGGCCAATTGTAAGGCTTC       |
| MCS    | PGSC0003DMT400031768 | Forward | GCGCCGTCTCGCTCGAATGGCGTCTTCACTATTTTTTTCA       |
|        |                      | Reverse | GCGCCGTCTCGCTCGAAGCCTATTTCTTCAATAAGAAGAACAACAG |
| IDI    | PGSC0003DMT400018755 | Forward | GCGCCGTCTCGCTCGAATGAGAGGAATTGATGGGAAC          |
|        |                      | Reverse | GCGCCGTCTCGCTCGAAGCTTAAGTCAATTTGTGGATGGTTTTTC  |
| GGPPS3 | PGSC0003DMT400097473 | Forward | GCGCCGTCTCGCTCGAATGAGTCTTTCAACAACAATTACTAC     |
|        |                      | Reverse | GCGCCGTCTCGCTCGAAGCTTAATTCTCTCTGTAAGCAATATAATC |
| SDS    | PGSC0003DMT400018242 | Forward | GCGCCGTCTCGCTCGAGCCATGATGTCTGTGAGTTGCCAT       |
|        |                      | Reverse | GCGCCGTCTCGCTCGAAGCCTATTCAATTCTCTCCAGATTATAC   |
| SIDPS  | --                   | Forward | ATGATATTTTCAAAGGGTTTATCTCAG                    |
|        |                      | Reverse | CTATTTTGTCTTGTGATGACTCTG                       |
